# Supplementary material for: Genomic landscape of pediatric B-other acute lymphoblastic leukemia in a consecutive European cohort
Source: PubMed Central journal article supplement — Haematologica. 2019 Jan 10;104(7):1396–406. doi: 10.3324/haematol.2018.204974 (PMC6601078; doi:10.3324/haematol.2018.204974), 2019-07
Supplement: 2018_204974-Disclosures_and_Contributions.pdf [file 2018_204974-Disclosures_and_Contributions.pdf]

Haematologica  
HAEMATOL/2018/204974  
Version 4

Genomic landscape of pediatric B-other acute lymphoblastic leukemia  
in a consecutive European cohort

Marketa Zaliova, Jan Stuchly, Lucie Winkowska, Alena Musilova, Karel Fiser, Martina Slamova, Julia Starkova, Martina Vaskova, Ondrej Hrusak, Lucie Sramkova, Jan Stary, Jan Zuna, and Jan Trka

Disclosures: No relevant conflicts of interest to disclose

Contributions: MZ and JT designed the research, MZ, JaStu, LW, AM, KF and MS performed research and analyzed data, MZ, JuS, MV, OH, LS, JaSta, JZ and JT collected and interpreted data, MZ wrote the paper. All authors revised the paper and approved the final version.
